# Supplementary material
Source: PubMed Central journal article supplement (PMC3787401)
Supplement: Supp_Table1.pdf [file Supp_Table1.pdf]

## Supplementary Data

SUPPLEMENTARY TABLE S1. PREDICTION OF ERECTILE FUNCTION RECOVERY AT 12 MONTHS FOLLOWING SURGERY

|              | <i>Univariate</i> |               |                | <i>Multivariate</i> |               |                |
|--------------|-------------------|---------------|----------------|---------------------|---------------|----------------|
|              | <i>OR</i>         | <i>95% CI</i> | <i>P value</i> | <i>OR</i>           | <i>95% CI</i> | <i>P value</i> |
| Age          | 0.912             | 0.885–0.939   | <0.001         | 0.957               | 0.926–0.990   | 0.011          |
| IIEF-5       | 1.172             | 1.133–1.212   | <0.001         | 1.151               | 1.112–1.191   | <0.001         |
| Prostate wt  | 0.982             | 0.971–0.994   | 0.003          | 0.993               | 0.980–1.006   | 0.289          |
| HACM use     | 0.628             | 0.425–0.930   | 0.020          | 0.709               | 0.447–1.127   | 0.709          |
| PDE5I intake | 1.538             | 0.703–3.363   | 0.281          | 1.060               | 0.404–2.782   | 0.906          |

OR = odds ratio; CI = confidence interval; IIEF = International Index of Erectile Function Short Survey; wt = weight; HACM = hyaluronic acid-carboxymethylcellulose; PDE5I = phosphodiesterase type 5 inhibitor.
