# Supplementary material
Source: PubMed Central journal article supplement (PMC3787401)
Supplement: Supp_Table2.pdf [file Supp_Table2.pdf]

SUPPLEMENTARY TABLE S2. RECOVERY OF ERECTILE FUNCTION IN SUBGROUP (IIEF-5  $\geq$  20)  
 ACCORDING TO THE TIME AFTER SURGERY

| <i>Postoperative time</i> | <i>Subgroup A (HACM use; n = 72)</i> | <i>Subgroup B (non-HACM use; n = 153)</i> | <i>P value</i> |
|---------------------------|--------------------------------------|-------------------------------------------|----------------|
| 3 months (%)              | 8 (11.1)                             | 18 (11.8)                                 | 1.000          |
| 6 months (%)              | 38 (52.8)                            | 36 (23.5)                                 | < 0.001        |
| 9 months (%)              | 44 (61.1)                            | 67 (43.8)                                 | 0.022          |
| 12 months (%)             | 52 (72.2)                            | 110 (71.9)                                | 1.000          |
| 18 months (%)             | 55 (76.4)                            | 113 (73.9)                                | 0.744          |
| 24 months (%)             | 55 (76.4)                            | 11 (7.2)                                  | 0.869          |
| 36 months (%)             | 55 (76.4)                            | 114 (74.5)                                | 0.869          |

HACM=hyaluronic acid-carboxymethylcellulose.
