# Supplementary material
Source: PubMed Central journal article supplement (PMC3787401)
Supplement: Supp_Table3.pdf [file Supp_Table3.pdf]

SUPPLEMENTARY TABLE S3. PREDICTION OF ERECTILE FUNCTION RECOVERY IN SUBGROUP (IIEF-5  $\geq$ 20) AT 6 MONTHS AFTER SURGERY

|              | <i>Univariate</i> |               |                | <i>Multivariate</i> |               |                |
|--------------|-------------------|---------------|----------------|---------------------|---------------|----------------|
|              | <i>OR</i>         | <i>95% CI</i> | <i>P value</i> | <i>OR</i>           | <i>95% CI</i> | <i>P value</i> |
| Age          | 0.955             | 0.914–0.997   | 0.037          | 0.950               | 0.905–0.998   | 0.040          |
| IIEF-5       | 1.220             | 1.026–1.457   | 0.024          | 1.190               | 0.988–1.433   | 0.067          |
| Prostate wt  | 1.012             | 0.994–1.031   | 0.188          | 1.017               | 0.996–1.038   | 0.109          |
| HACM use     | 3.632             | 2.004–6.583   | <0.001         | 3.560               | 1.926–6.580   | <0.001         |
| PDE5I intake | 0.671             | 0.206–2.190   | 0.508          | 1.718               | 0.202–2.556   | 0.609          |

OR=odds ratio; CI=confidence interval; IIEF=International Index of Erectile Function Short Survey; wt=weight; HACM=hyaluronic acid-carboxymethylcellulose; PDE5I=phosphodiesterase type 5 inhibitor.
