# Supplementary material
Source: PubMed Central journal article supplement (PMC3787401)
Supplement: Supp_Table4.pdf [file Supp_Table4.pdf]

SUPPLEMENTARY TABLE S4. PREDICTION OF ERECTILE FUNCTION RECOVERY IN SUBGROUP (IIEF  $\geq 20$ ) AT 12 MONTHS AFTER SURGERY

|              | <i>Univariate</i> |               |                | <i>Multivariate</i> |               |                |
|--------------|-------------------|---------------|----------------|---------------------|---------------|----------------|
|              | <i>OR</i>         | <i>95% CI</i> | <i>P value</i> | <i>OR</i>           | <i>95% CI</i> | <i>P value</i> |
| Age          | 0.925             | 0.888–0.970   | 0.001          | 0.926               | 0.883–0.972   | 0.002          |
| IIEF-5       | 1.083             | 0.917–1.279   | 0.349          | 1.029               | 0.862–1.227   | 0.754          |
| Prostate wt  | 0.992             | 0.973–1.011   | 0.381          | 0.999               | 0.979–1.019   | 0.898          |
| HACM use     | 1.016             | 0.544–1.898   | 0.959          | 1.012               | 0.530–1.931   | 0.972          |
| PDE5I intake | 0.850             | 0.222–3.247   | 0.812          | 0.792               | 0.199–3.145   | 0.740          |

OR=odds ratio; CI=confidence interval; IIEF=International Index of Erectile Function Short Survey; wt=weight; HACM=hyaluronic acid-carboxymethylcellulose; PDE5I=phosphodiesterase type 5 inhibitor.
