# Supplementary material
Source: PubMed Central journal article supplement (PMC3787401)
Supplement: Supp_Table5.pdf [file Supp_Table5.pdf]

SUPPLEMENTARY TABLE S5. RECOVERY OF ERECTILE FUNCTION ACCORDING TO THE TIME AFTER SURGERY

| <i>Postoperative time</i> | <i>Group 1 (HACM use; n=162)</i> | <i>Group 2* (non-HACM use; n=150)</i> | <i>P value</i> |
|---------------------------|----------------------------------|---------------------------------------|----------------|
| 3 months (%)              | 12 (7.5)                         | 11 (7.3)                              | 1.000          |
| 6 months (%)              | 45 (28.5)                        | 23 (15.3)                             | <0.001         |
| 9 months (%)              | 54 (34.2)                        | 40 (26.7)                             | 0.022          |
| 12 months (%)             | 66 (41.8)                        | 73 (48.7)                             | 1.000          |
| 18 months (%)             | 75 (47.5)                        | 76 (50.7)                             | 0.744          |
| 24 months (%)             | 76 (48.1)                        | 76 (50.7)                             | 0.869          |
| 36 months (%)             | 76 (48.1)                        | 76 (50.7)                             | 0.869          |

\*Last 150 patients of group 2 who underwent surgeries subsequently to group 1.
