# Supplementary material
Source: PubMed Central journal article supplement (PMC3787401)
Supplement: Supp_Table6.pdf [file Supp_Table6.pdf]

SUPPLEMENTARY TABLE S6. RECOVERY OF ERECTILE FUNCTION IN SUBGROUP (IIEF-5  $\geq$  20)  
ACCORDING TO THE TIME AFTER SURGERY

| <i>Postoperative time</i> | <i>Subgroup A (HACM use; n = 72)</i> | <i>Subgroup B* (non-HACM use; n = 80)</i> | <i>P value</i> |
|---------------------------|--------------------------------------|-------------------------------------------|----------------|
| 3 months (%)              | 8 (11.1)                             | 8 (10.0)                                  | 0.824          |
| 6 months (%)              | 38 (52.8)                            | 17 (21.3)                                 | <0.001         |
| 9 months (%)              | 44 (61.1)                            | 31 (38.8)                                 | 0.006          |
| 12 months (%)             | 52 (72.2)                            | 55 (68.8)                                 | 0.640          |
| 18 months (%)             | 55 (76.4)                            | 57 (71.3)                                 | 0.473          |
| 24 months (%)             | 55 (76.4)                            | 57 (71.3)                                 | 0.473          |
| 36 months (%)             | 55 (76.4)                            | 57 (71.3)                                 | 0.473          |

\*Among last 150 patients of group 2 who underwent surgeries subsequently to Group 1.
