# Supplementary material
Source: PubMed Central journal article supplement (PMC3787401)
Supplement: Supp_Table7.pdf [file Supp_Table7.pdf]

SUPPLEMENTARY TABLE S7. PREDICTION OF ERECTILE FUNCTION RECOVERY AT 6 MONTHS AFTER UURGERY

|              | <i>Univariate</i> |               |                | <i>Multivariate</i> |               |                |
|--------------|-------------------|---------------|----------------|---------------------|---------------|----------------|
|              | <i>OR</i>         | <i>95% CI</i> | <i>P value</i> | <i>OR</i>           | <i>95% CI</i> | <i>P value</i> |
| Age          | 0.922             | 0.885–0.960   | <0.001         | 0.947               | 0.901–0.995   | 0.031          |
| IIEF-5       | 1.152             | 1.090–1.217   | <0.001         | 1.144               | 1.079–1.213   | <0.001         |
| Prostate wt  | 0.997             | 0.982–1.011   | 0.652          | 1.006               | 0.990–1.023   | 0.432          |
| HACM use     | 2.199             | 1.253–3.860   | 0.006          | 3.210               | 1.717–6.003   | <0.001         |
| PDE5I intake | 1.220             | 0.396–3.754   | 0.729          | 0.968               | 0.270–3.466   | 0.960          |

OR=odds ratio; CI=confidence interval; IIEF=International Index of Erectile Function Short Survey; wt=weight; HACM=hyaluronic acid-carboxymethylcellulose; PDE5I=phosphodiesterase type 5 inhibitor.
